# Supplementary material
Source: Springer Nature journal article supplement (https://www.springermedizin.de/resource/supplementary/12875_2007_226_MOESM2_ESM.pdf/9436552)
Supplement: MOESM2 [file 9436552]

Baseline assessments of consented participants

Practice cluster randomisation with stratification based on fee-for-service private practice or state government funded community health centre status

**INTERVENTION:**

- Usual GP care
- Practice Nurses are trained to deliver COACH program by telephone (and 1 face to face) over 18 months

**CONTROL:**

- Usual GP care

All participants have a 1-hour appointment with study nurses to collect 12-month follow-up data

All participants have a 1-hour appointment with study nurses to collect 18-month follow-up data
